# Supplementary material
Source: Springer Nature journal article supplement (https://www.springermedizin.de/resource/supplementary/12950_2009_158_MOESM3_ESM.pdf/9558084)

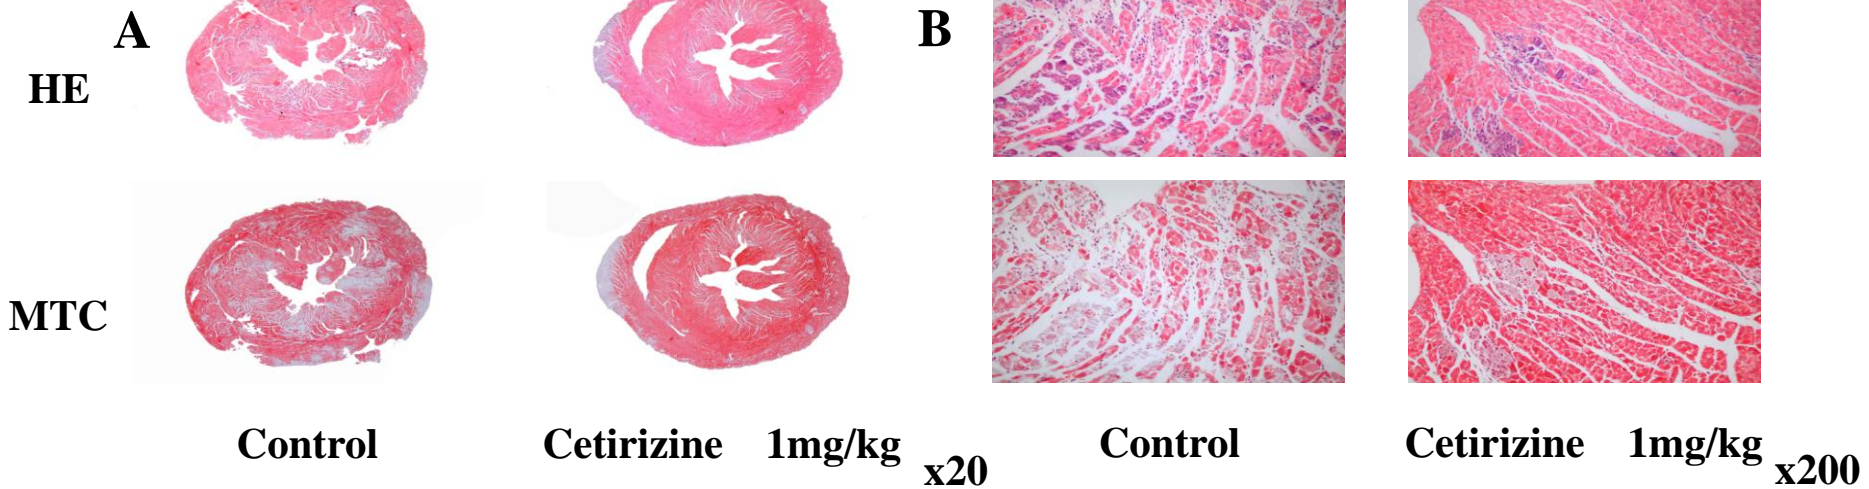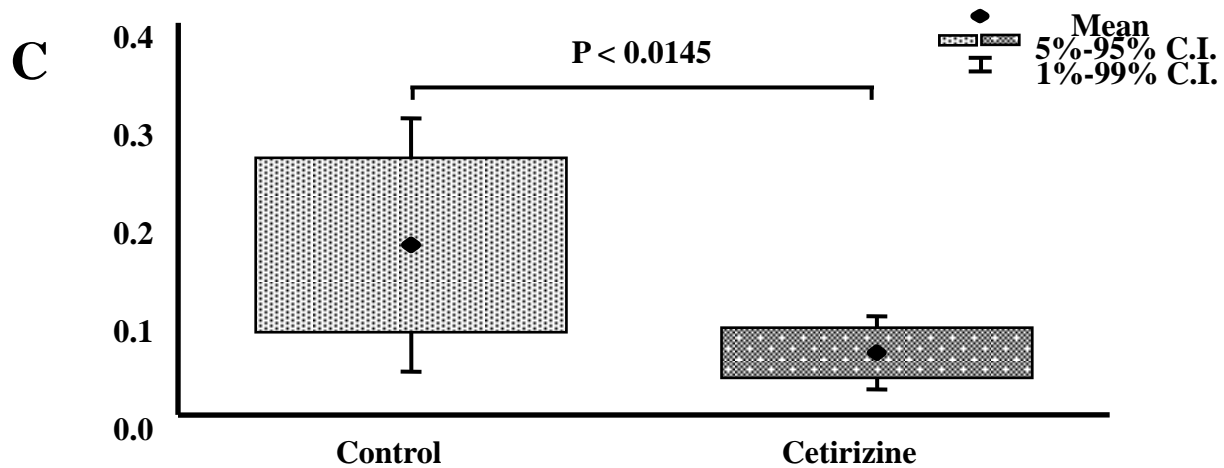

Supplement: MOESM3 [file 9558084]
